# Supplementary material for: Controlling C–C coupling in electrocatalytic reduction of CO2 over Cu1−xZnx/C
Source: Royal Society of Chemistry journal article supplement (doi:10.1039/d2nr03634g), 2022-01-01
Supplement: d2nr03634g1.pdf [file d2nr03634g1.pdf]

*Supporting information*

**Controlling C-C coupling in Electrocatalytic Reduction of CO<sub>2</sub> over  
Cu<sub>1-x</sub>Zn<sub>x</sub>/C**

**Soumitra Payra<sup>1</sup>, Sayan Kanungo<sup>2,3</sup>, Sounak Roy<sup>\*1,3</sup>**

<sup>1</sup> *Department of Chemistry, BITS Pilani, Hyderabad Campus, Hyderabad-500078, India*

<sup>2</sup> *Electrical and Electronics Engineering Department, BITS Pilani, Hyderabad Campus,  
Hyderabad-500078, India*

<sup>3</sup> *Materials Center for Sustainable Energy & Environment, BITS Pilani Hyderabad Campus,  
Hyderabad – 500078, India*

\*Corresponding Author

orcid.org/0000-0003-1070-2068;

Email: [sounak.roy@hyderabad.bits-pilani.ac.in](mailto:sounak.roy@hyderabad.bits-pilani.ac.in) (*Sounak Roy*)

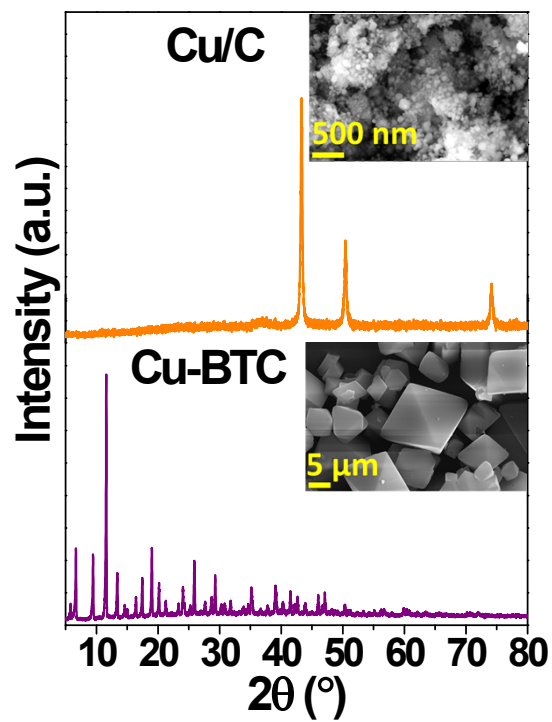

**Fig. S1** XRD patterns and SEM micrographs of pristine Cu-BTC MOFs and Cu/C NPs

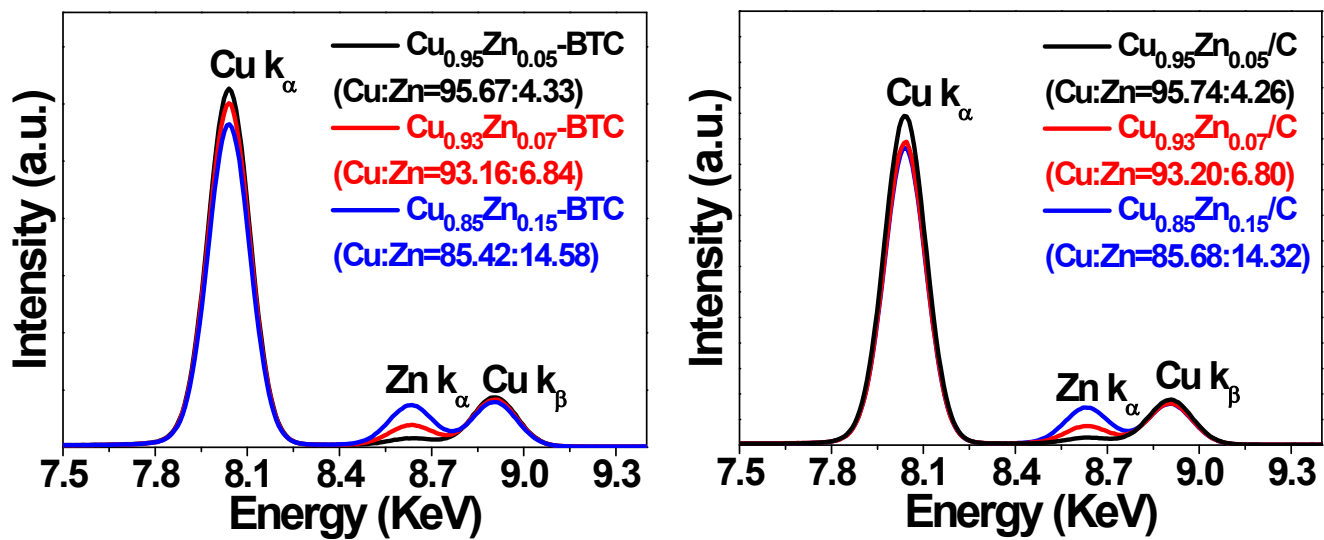

Fig. S2 XRF data of Cu<sub>1-x</sub>Zn<sub>x</sub>-BTC MOFs and Cu<sub>1-x</sub>Zn<sub>x</sub>/C NPs.

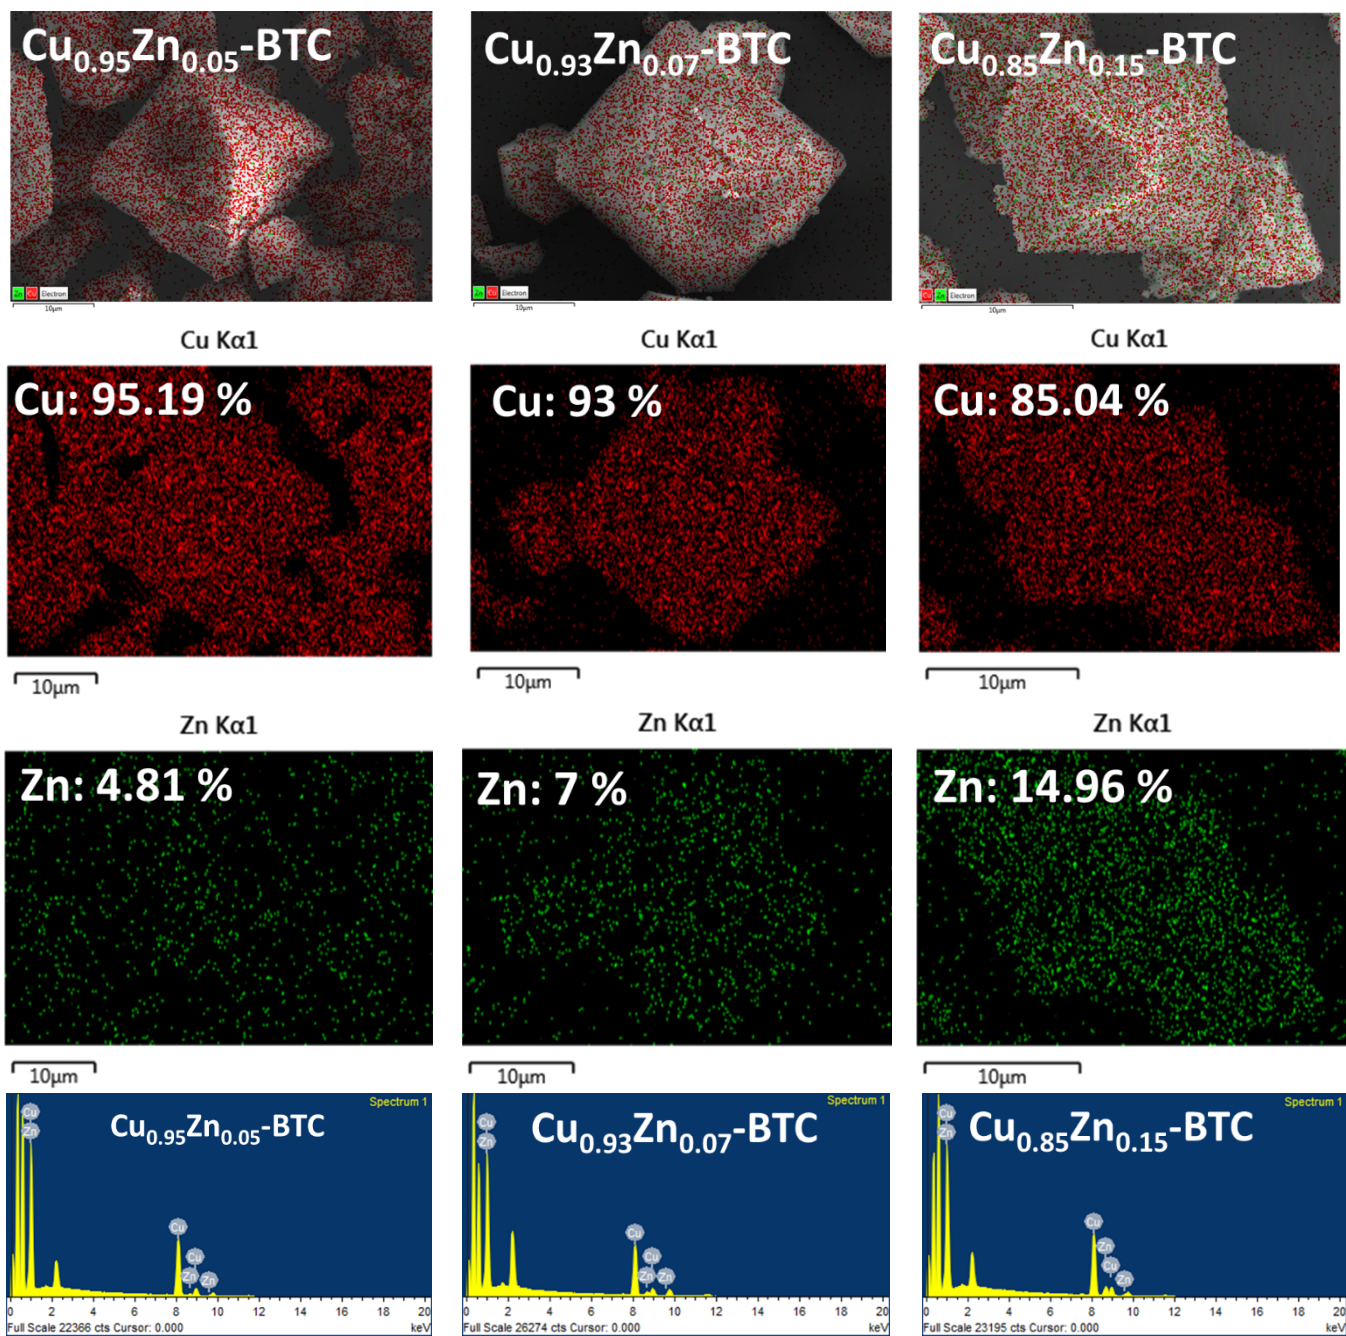

**Fig. S3** EDS elemental mapping of Cu<sub>1-x</sub>Zn<sub>x</sub>-BTC MOFs.

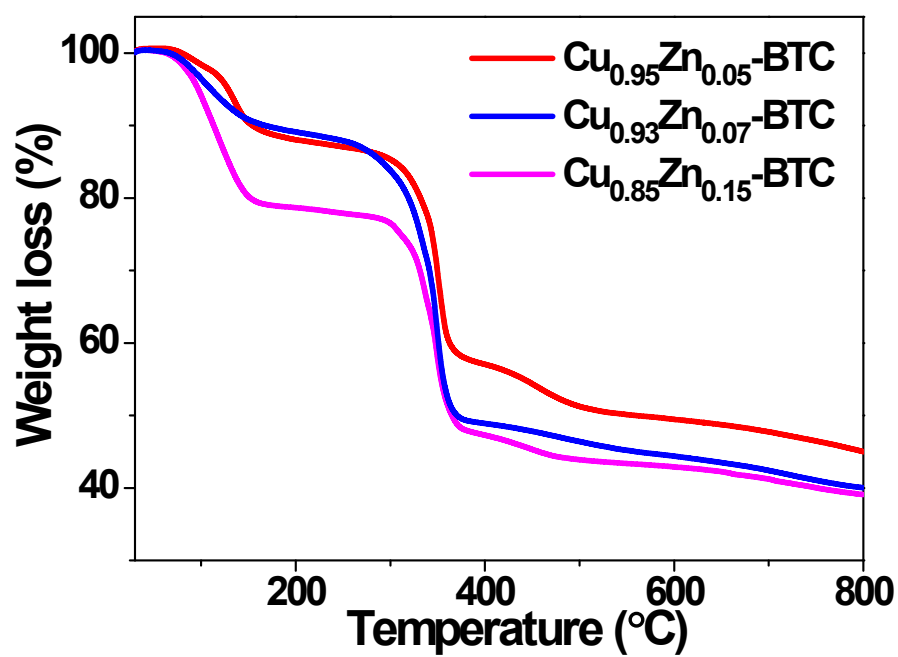

Fig. S4 TGA plot of Cu<sub>1-x</sub>Zn<sub>x</sub>-BTC MOFs.

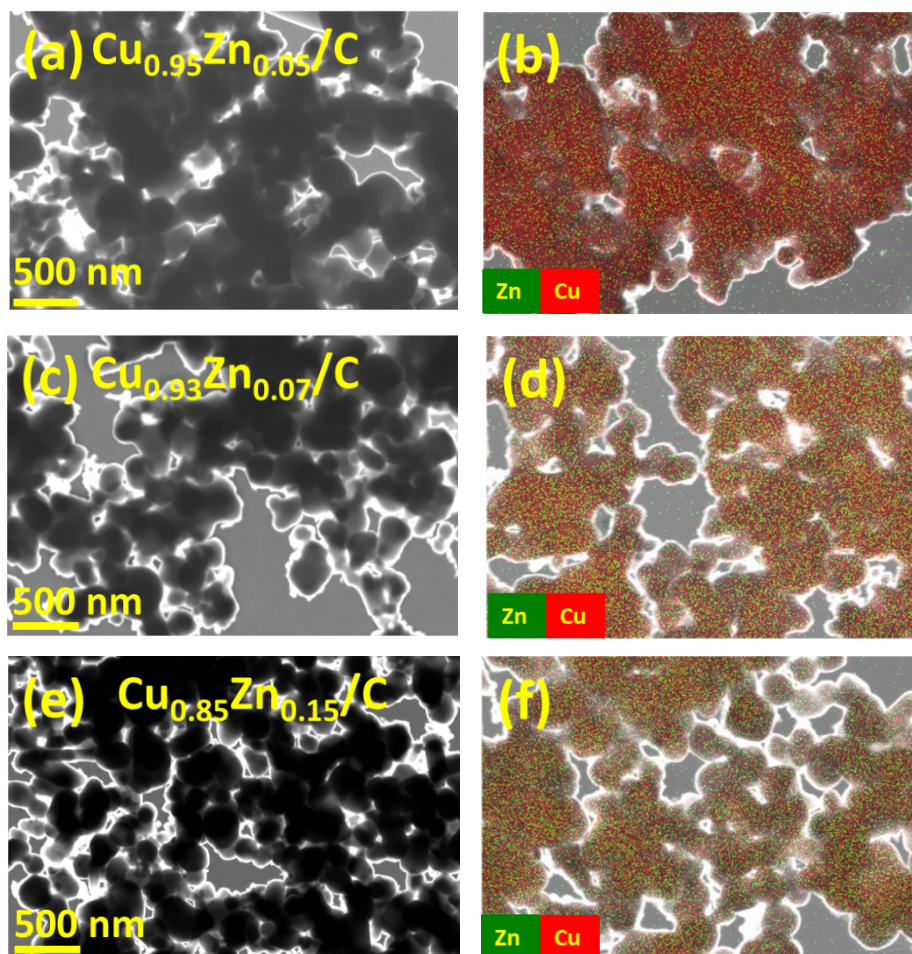

**Fig. S5** STEM micrographs and elemental mapping of (a,b)  $\text{Cu}_{0.95}\text{Zn}_{0.05}/\text{C}$ , (c,d)  $\text{Cu}_{0.93}\text{Zn}_{0.07}/\text{C}$ , and (e,f)  $\text{Cu}_{0.85}\text{Zn}_{0.15}/\text{C}$ .

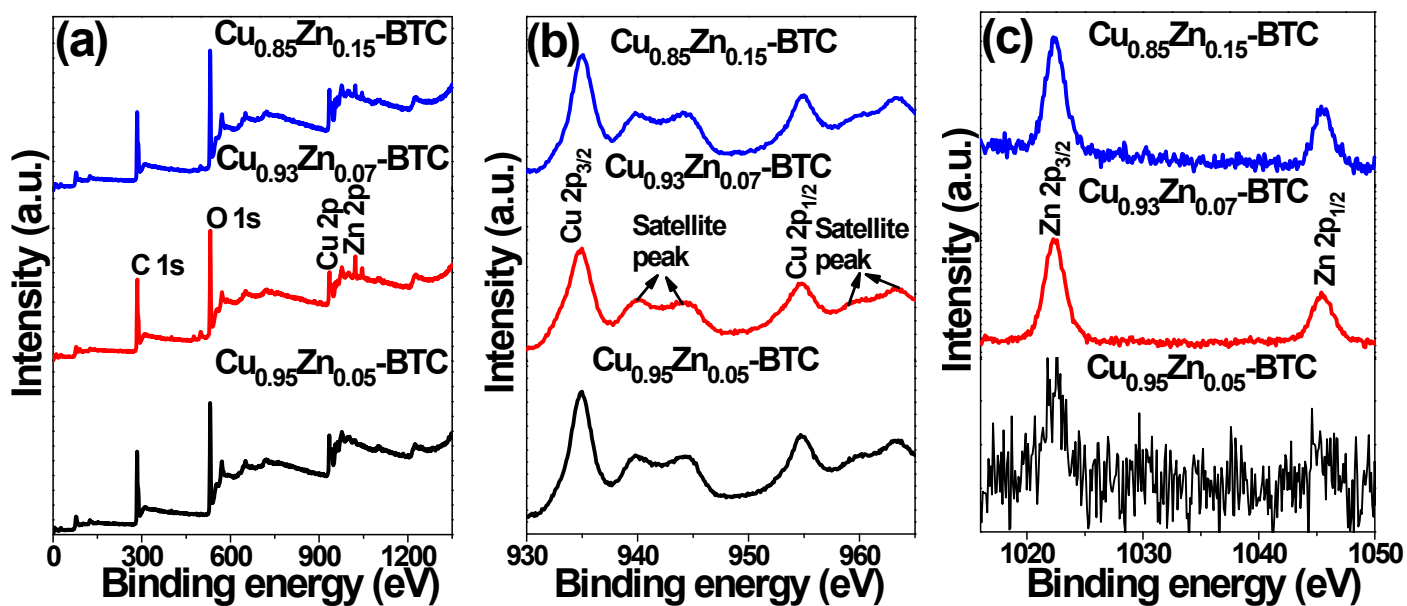

**Fig. S6** (a) XPS survey spectra, (b) Cu 2p and (c) Zn 2p core-level spectrum of bimetallic  $\text{Cu}_{1-x}\text{Zn}_x\text{-BTC}$  MOFs.

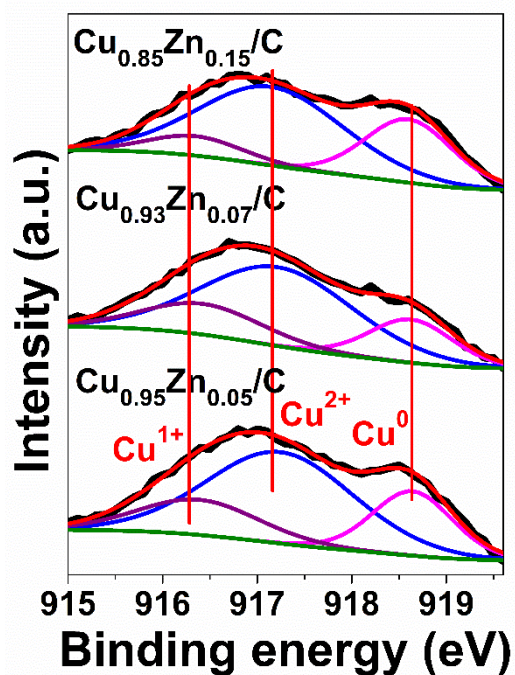

**Fig. S7** The Auger Cu LM2 spectra of synthesized  $\text{Cu}_{1-x}\text{Zn}_x/\text{C}$ .

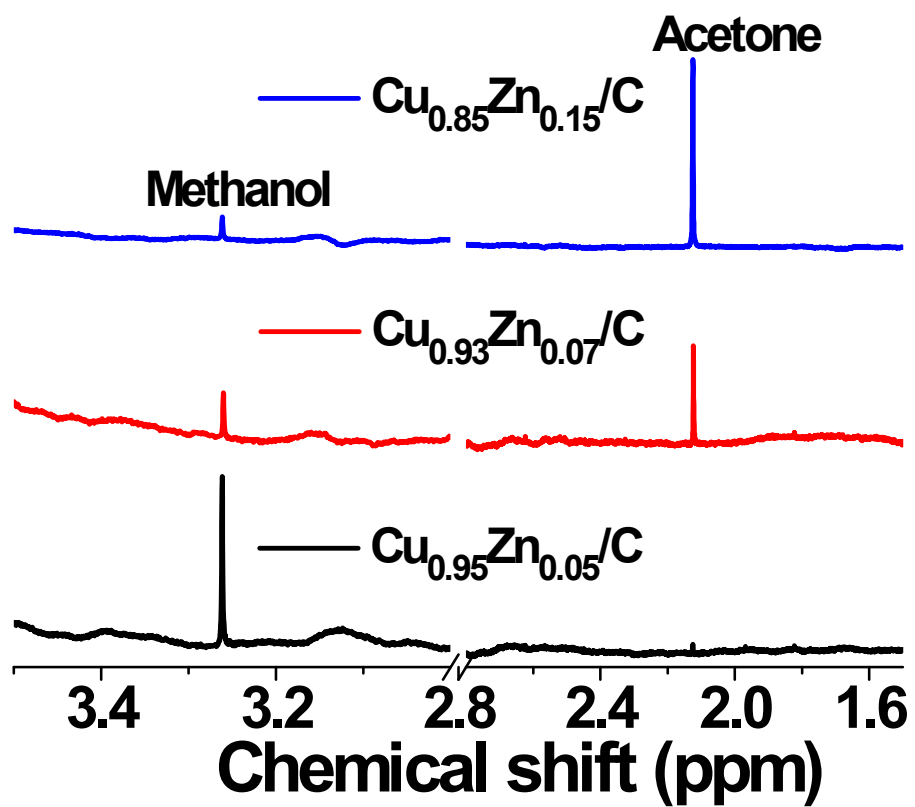

**Fig. S8**  $^1\text{H}$  NMR plot after 4 h electrolysis of the Cu<sub>1-x</sub>Zn<sub>x</sub>/C at a potential -0.40 V vs. RHE.



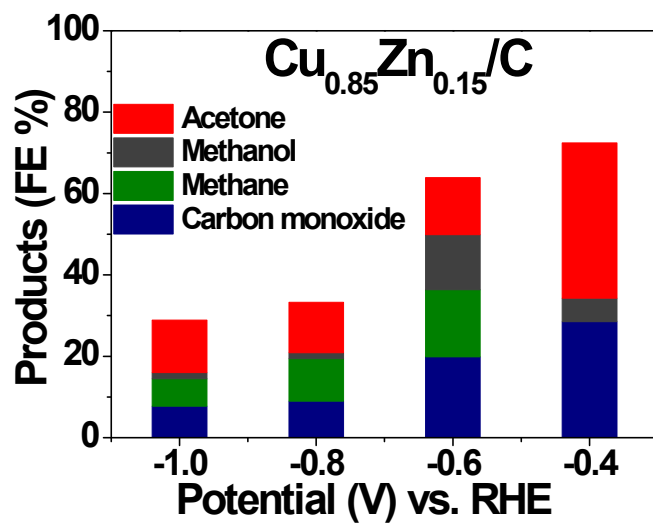

**Fig. S9** Faraday efficiency of CO<sub>2</sub>RR products as a function of potential over Cu<sub>0.85</sub>Zn<sub>0.15</sub>/C.

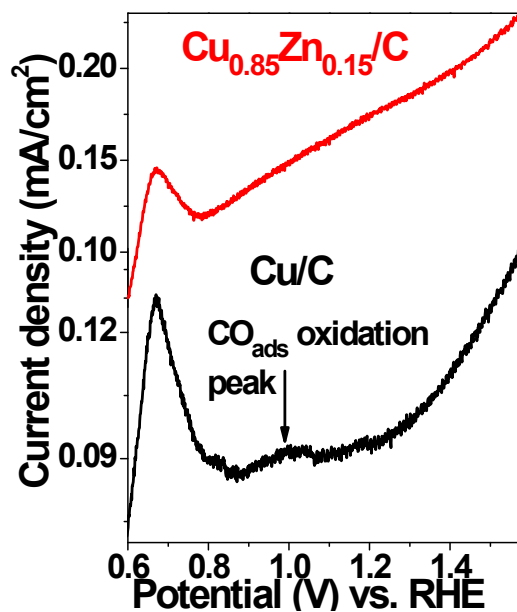

**Fig. S10** LSV plot of CO stripping over Cu/C and Cu<sub>0.85</sub>Zn<sub>0.15</sub>/C in presence of 0.1 M NaHCO<sub>3</sub> as an electrolyte at 50 mV/s scan rate. In this experiment, CO was adsorbed over both the catalysts and then the electrocatalytic oxidation of adsorbed CO was performed over both the materials. The LSV data exhibited an anodic peak due to the oxidation of adsorbed CO over Cu/C, whereas the similar peak was absent over the Cu<sub>0.85</sub>Zn<sub>0.15</sub>/C nano-alloy. This strongly suggests that presence of Zn in the lattice desorbs the adsorbed CO, and therefore no anodic peak was observed in CO stripping experiment over Cu<sub>0.85</sub>Zn<sub>0.15</sub>/C.

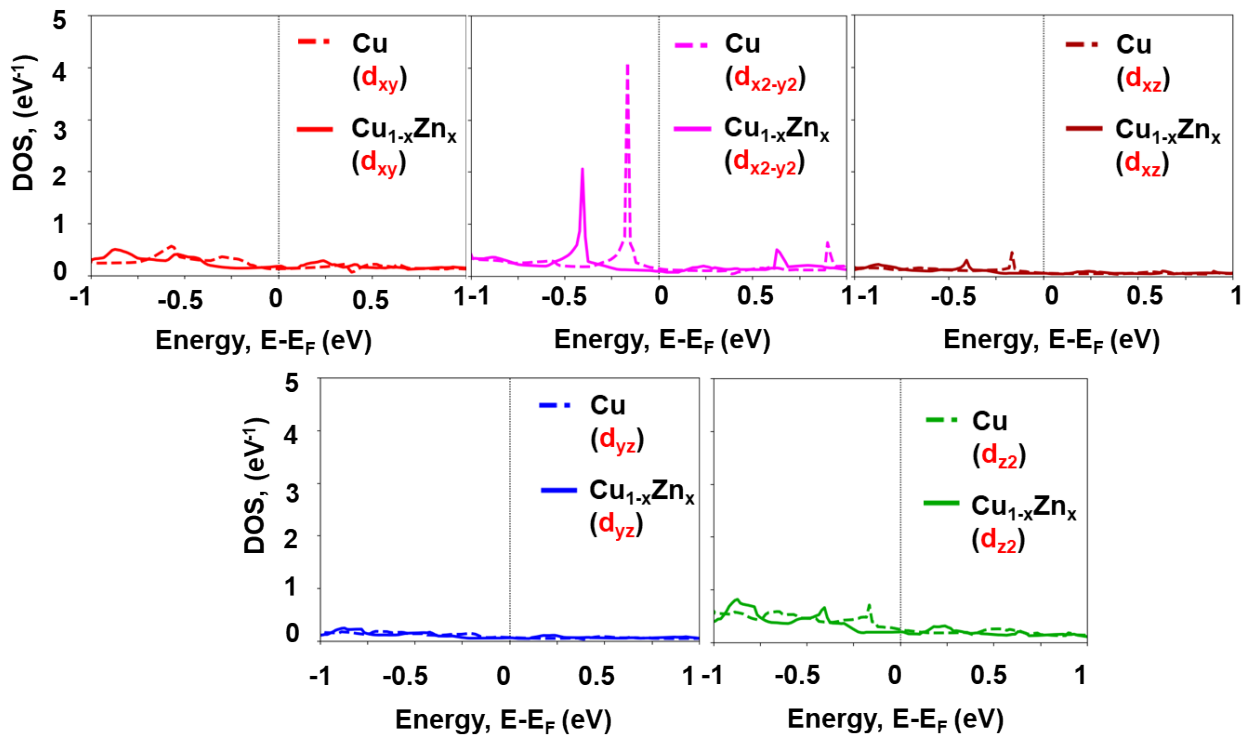

Fig. S11 DOS of Cu(111) and  $C_{1-x}Zn_x$  (111).

**Table S1:** Comparison of the present catalyst with the literature on electrochemical reduction of CO<sub>2</sub> using various electrodes and electrolytes.

| Catalyst                                     | Electrolyte              | Electrode potential | Faradaic efficiency (%)                                                                                                                       | Ref.      |
|----------------------------------------------|--------------------------|---------------------|-----------------------------------------------------------------------------------------------------------------------------------------------|-----------|
| Cu-SA/NPC                                    | 0.1 M KHCO <sub>3</sub>  | -0.36 (vs. RHE)     | $FE_{CH_3OH} = 3.27$<br>$FE_{CH_3COCH_3} = 36.7$                                                                                              | 1         |
| Cu <sub>75</sub> Zn <sub>25</sub> -C         | 0.1 M KHCO <sub>3</sub>  | -0.99 (vs. RHE)     | $FE_{HCO_2H} = 5.2$<br>$FE_{C_2H_5OH} = 7.2$<br>$FE_{C_2H_4} = 15.4$                                                                          | 2         |
| OD-Cu <sub>75</sub> Zn <sub>25</sub> (cubes) | 0.1 M KHCO <sub>3</sub>  | -1.1 (vs. RHE)      | $FE_{HCO_2H} = 2.5$<br>$FE_{CH_4} = 18.2$<br>$FE_{C_2H_5OH} = 16.1$<br>$FE_{C_2H_4} = 41.1$<br>$FE_{C_3H_7OH} = 2.2$                          | 3         |
| CuZn alloy                                   | 0.1 M KHCO <sub>3</sub>  | -1.1 (vs. RHE)      | $FE_{CO} = 14.1$<br>$FE_{C_2H_5OH} = 0.8$<br>$FE_{C_2H_4} = 33.3$                                                                             | 4         |
| Cu <sub>4</sub> Zn                           | 0.1 M KHCO <sub>3</sub>  | -1.05 (vs. RHE)     | $FE_{CO} = 10.36$<br>$FE_{CH_4} = 0.42$<br>$FE_{HCO_2H} = 0.32$<br>$FE_{C_2H_4} = 10.75$<br>$FE_{C_2H_5OH} = 29.14$<br>$FE_{C_3H_7OH} = 4.39$ | 5         |
| TLHP Cu <sub>5</sub> Zn <sub>8</sub>         | 0.1 M KHCO <sub>3</sub>  | -0.8 (vs. RHE)      | $FE_{CO} = 14.3$<br>$FE_{HCO_2H} = 4.3$<br>$FE_{CH_3CO_2H} = 11.7$<br>$FE_{C_2H_5OH} = 46.6$                                                  | 6         |
| CuZn <sub>20</sub> /NGN                      | 0.1 M KHCO <sub>3</sub>  | -0.8 (vs. RHE)      | $FE_{C_2H_5OH} = 34.25$                                                                                                                       | 7         |
| Cu <sub>2</sub> O                            | 0.5 M KHCO <sub>3</sub>  | -1.30 (vs. Ag/AgCl) | $FE_{CH_3OH} = 45.7$                                                                                                                          | 8         |
| Cu <sub>2</sub> O/ZnO (1:1)                  |                          |                     | $FE_{CH_3OH} = 17.7$                                                                                                                          |           |
| Cu <sub>0.95</sub> Zn <sub>0.05</sub> /C     | 0.1 M NaHCO <sub>3</sub> | -0.40 V (vs. RHE)   | $FE_{CH_3OH} = 29.1$<br>$FE_{CH_3COCH_3} = 12.3$                                                                                              | This work |
| Cu <sub>0.93</sub> Zn <sub>0.07</sub> /C     |                          |                     | $FE_{CH_3OH} = 16.37$<br>$FE_{CH_3COCH_3} = 19.0$                                                                                             |           |

|                                          |  |  |                                                 |  |
|------------------------------------------|--|--|-------------------------------------------------|--|
| Cu <sub>0.85</sub> Zn <sub>0.15</sub> /C |  |  | $FE_{CH_3OH} = 5.8$<br>$FE_{CH_3COCH_3} = 38.1$ |  |
|------------------------------------------|--|--|-------------------------------------------------|--|

## REFERENCES:

- 1 K. Zhao, X. Nie, H. Wang, S. Chen, X. Quan, H. Yu, W. Choi, G. Zhang, B. Kim and J. G. Chen, *Nat. Commun.*, 2020, **11**, 2455–2464.
- 2 S. Juntrapirom, J. Santatiwongchai, A. Watwiangkham, S. Suthirakun, T. Butburee, K. Faungnawakij, P. Chakthranont, P. Hirunsit and B. Rungtaweeworani, *Catal. Sci. Technol.*, 2021, **11**, 8065–8078.
- 3 A. H. M. da Silva, S. J. Raaijman, C. S. Santana, J. M. Assaf, J. F. Gomes and M. T. M. Koper, *J. Electroanal. Chem.*, 2021, **880**, 114750–114758.
- 4 Y. Feng, Z. Li, H. Liu, C. Dong, J. Wang, S. A. Kulinich and X. Du, *Langmuir*, 2018, **34**, 13544–13549.
- 5 D. Ren, B. S. H. Ang and B. S. Yeo, *ACS Catal.*, 2016, **6**, 8239–8247.
- 6 X. Su, Y. Sun, L. Jin, L. Zhang, Y. Yang, P. Kerns, B. Liu, S. Li and J. He, *Appl. Catal. B Environ.*, 2020, **269**, 118800–118807.
- 7 S. Dongare, N. Singh and H. Bhunia, *Appl. Surf. Sci.*, 2021, **556**, 149790–149799.
- 8 J. Albo, A. Sáez, J. Solla-Gullón, V. Montiel and A. Irabien, *Appl. Catal. B Environ.*, 2015, **176–177**, 709–717.
